# Supplementary material for: Practice Patterns for Acute Ischemic Stroke Workup: A Longitudinal Population‐Based Study
Source: PubMed Central journal article supplement — J Am Heart Assoc. 2017 Jun 23;6(6):e005097. doi: 10.1161/JAHA.116.005097 (PMC5669157; doi:10.1161/jaha.116.005097), 2017-06-23
Supplement: JAH3-6-e005097-s001.pdf [file JAH3-6-e005097-s001.pdf]

# **SUPPLEMENTAL MATERIAL**

**Table S1.** In-Hospital Ischemic Stroke Workup, 2005 and 2010 Study Periods

| Diagnostic Test                | 2005<br>N=1403 | 2010<br>N=1475 | p-value |
|--------------------------------|----------------|----------------|---------|
| Complete Workup                | 1036 (74%)     | 1144 (78%)     | 0.02    |
| Cardiac Assessment             | 1140 (81%)     | 1293 (88%)     | <0.0001 |
| Extracranial Arteries Assessed | 1185 (84%)     | 1252 (85%)     | 0.75    |

**Table S2.** Etiology Determined by Diagnostic Testing and Physician Adjudication, 2005 and 2010 Study Periods

| Etiology     | 2005<br>N=1403 | 2010<br>N=1475 | p    |
|--------------|----------------|----------------|------|
| Undetermined | 581 (41%)      | 562 (38%)      | 0.07 |
